# Supplementary material for: New Ce(iii) sulfate–tartrate-based MOFs: an insight into the controllable self-assembly of acentric metal–organic complexes
Source: Royal Society of Chemistry journal article supplement (doi:10.1039/c3ce41740a), 2013-01-01

## Supplementary materials

### **New Ce (III) Sulfate-Tartrate-Based MOFs: An Insight into Controllable Self-Assembly of Acentric Metal-Organic Complexes**

**Jin-Li Qi, Yue-Qing Zheng,\* Wei Xu, Hong-Lin Zhu, Jian-Li Lin, Hai-Sheng**

**Chang**

Crystal Engineering Division

Center for Applied Solid State Chemistry Research

Ningbo University, Ningbo, 315211 P.R. China

\* Corresponding author. Phone: Int. +574/87600747; Fax: Int. +574/87600792

E-mail address: *zhengcm@nbu.edu.cn*

**Table S1.** Selected Interatomic Distances (Å) and Bond Angles (deg) for **1<sup>a</sup>**

|                                       |          |                                       |          |                                       |          |
|---------------------------------------|----------|---------------------------------------|----------|---------------------------------------|----------|
| Ce–O1                                 | 2.492(3) | Ce–O4 <sup>#2</sup>                   | 2.659(4) | Ce–O7                                 | 2.563(4) |
| Ce–O2 <sup>#1</sup>                   | 2.475(3) | Ce–O5 <sup>#3</sup>                   | 2.514(4) | Ce–O8                                 | 2.594(4) |
| Ce–O3                                 | 2.535(4) | Ce–O6 <sup>#2</sup>                   | 2.473(4) | Ce–O9                                 | 2.535(4) |
| O1–Ce–O2 <sup>#1</sup>                | 129.0(1) | O2 <sup>#1</sup> –Ce–O7               | 126.7(1) | O4 <sup>#2</sup> –Ce–O8               | 133.1(1) |
| O1–Ce–O3                              | 61.1(1)  | O2 <sup>#1</sup> –Ce–O8               | 73.2(1)  | O4 <sup>#2</sup> –Ce–O9               | 65.9(1)  |
| O1–Ce–O4 <sup>#2</sup>                | 120.3(1) | O2 <sup>#1</sup> –Ce–O9               | 82.1(1)  | O5 <sup>#3</sup> –Ce–O6 <sup>#2</sup> | 93.1(1)  |
| O1–Ce–O5 <sup>#3</sup>                | 70.2(1)  | O3–Ce–O4 <sup>#2</sup>                | 127.1(1) | O5 <sup>#3</sup> –Ce–O7               | 72.0(1)  |
| O1–Ce–O6 <sup>#2</sup>                | 72.8(1)  | O3–Ce–O5 <sup>#3</sup>                | 131.3(1) | O5 <sup>#3</sup> –Ce–O8               | 123.5(1) |
| O1–Ce–O7                              | 76.2(1)  | O3–Ce–O6 <sup>#2</sup>                | 72.3(1)  | O5 <sup>#3</sup> –Ce–O9               | 82.7(1)  |
| O1–Ce–O8                              | 106.6(1) | O3–Ce–O7                              | 96.5(1)  | O6 <sup>#2</sup> –Ce–O7               | 148.7(1) |
| O1–Ce–O9                              | 148.5(1) | O3–Ce–O8                              | 74.3(1)  | O6 <sup>#2</sup> –Ce–O8               | 141.5(2) |
| O2 <sup>#1</sup> –Ce–O3               | 70.6(1)  | O3–Ce–O9                              | 143.5(2) | O6 <sup>#2</sup> –Ce–O9               | 126.0(1) |
| O2 <sup>#1</sup> –Ce–O4 <sup>#2</sup> | 76.8(1)  | O4 <sup>#2</sup> –Ce–O5 <sup>#3</sup> | 76.7(1)  | O7–Ce–O8                              | 53.7(1)  |
| O2 <sup>#1</sup> –Ce–O5 <sup>#3</sup> | 153.1(1) | O4 <sup>#2</sup> –Ce–O6 <sup>#2</sup> | 60.8(1)  | O7–Ce–O9                              | 80.5(1)  |
| O2 <sup>#1</sup> –Ce–O6 <sup>#2</sup> | 78.1(1)  | O4 <sup>#2</sup> –Ce–O7               | 136.4(1) | O8–Ce–O9                              | 74.9(2)  |

Hydrogen bonding contacts

| D–H···A                       | d(D–H) | d(H···A) | d(D···A) | ∠(D–H···A) |
|-------------------------------|--------|----------|----------|------------|
| O3–H3A···O12A                 | 0.86   | 1.81     | 2.560    | 144        |
| O3–H3A···O12B                 | 0.86   | 1.84     | 2.690    | 171        |
| O4–H4A···O6 <sup>#2</sup>     | 0.85   | 1.77     | 2.617    | 173        |
| O9–H91···O11                  | 0.81   | 2.18     | 2.833    | 139        |
| O9–H92···O1 <sup>#1</sup>     | 0.83   | 1.98     | 2.808    | 173        |
| O10–H10···O8                  | 0.84   | 1.97     | 2.801    | 170        |
| O11–H11···O7 <sup>#4</sup>    | 0.85   | 2.28     | 3.067    | 153        |
| O12A–H121···O9 <sup>#5</sup>  | 0.82   | 2.14     | 2.760    | 132        |
| O12A–H122···O10               | 0.82   | 2.31     | 3.005    | 143        |
| O12A–H122···O11 <sup>#5</sup> | 0.82   | 2.34     | 2.990    | 137        |
| O12B–H123···O7 <sup>#5</sup>  | 0.79   | 2.15     | 2.904    | 160        |
| O12B–H124···O9 <sup>#5</sup>  | 0.76   | 2.59     | 3.354    | 176        |

<sup>a</sup> Symmetry transformations used to generate equivalent atoms: #1 =  $x, y, z+1$ ; #2 =  $-x+3/2, y+1/2, -z$ ; #3 =  $x, y+1, z$ ; #4 =  $-x+1, y, -z$ ; #5 =  $x, y-1, z$ .

**Table S2.** Selected Interatomic Distances (Å) and Bond Angles (deg) for **2<sup>a</sup>**

|                                       |          |                                       |          |                                       |          |
|---------------------------------------|----------|---------------------------------------|----------|---------------------------------------|----------|
| Ce–O1                                 | 2.483(4) | Ce–O4 <sup>#2</sup>                   | 2.653(4) | Ce–O7                                 | 2.564(5) |
| Ce–O2 <sup>#1</sup>                   | 2.475(4) | Ce–O5 <sup>#3</sup>                   | 2.513(5) | Ce–O8                                 | 2.600(5) |
| Ce–O3                                 | 2.539(5) | Ce–O6 <sup>#2</sup>                   | 2.474(5) | Ce–O9                                 | 2.555(5) |
| O1–Ce–O2 <sup>#1</sup>                | 128.8(1) | O2 <sup>#1</sup> –Ce–O7               | 126.7(2) | O4 <sup>#2</sup> –Ce–O8               | 132.9(1) |
| O1–Ce–O3                              | 61.5(1)  | O2 <sup>#1</sup> –Ce–O8               | 73.2(2)  | O4 <sup>#2</sup> –Ce–O9               | 66.0(2)  |
| O1–Ce–O4 <sup>#2</sup>                | 120.3(2) | O2 <sup>#1</sup> –Ce–O9               | 81.8(1)  | O5 <sup>#3</sup> –Ce–O6 <sup>#2</sup> | 93.4(2)  |
| O1–Ce–O5 <sup>#3</sup>                | 70.2(2)  | O3–Ce–O4 <sup>#2</sup>                | 127.2(1) | O5 <sup>#3</sup> –Ce–O7               | 72.0(2)  |
| O1–Ce–O6 <sup>#2</sup>                | 72.7(2)  | O3–Ce–O5 <sup>#3</sup>                | 130.7(2) | O5 <sup>#3</sup> –Ce–O8               | 123.5(2) |
| O1–Ce–O7                              | 76.5(2)  | O3–Ce–O6 <sup>#2</sup>                | 72.0(2)  | O5 <sup>#3</sup> –Ce–O9               | 83.2(2)  |
| O1–Ce–O8                              | 106.8(2) | O3–Ce–O7                              | 96.5(2)  | O6 <sup>#2</sup> –Ce–O7               | 148.9(2) |
| O1–Ce–O9                              | 149.0(2) | O3–Ce–O8                              | 74.7(2)  | O6 <sup>#2</sup> –Ce–O8               | 141.3(2) |
| O2 <sup>#1</sup> –Ce–O3               | 71.0(1)  | O3–Ce–O9                              | 143.5(2) | O6 <sup>#2</sup> –Ce–O9               | 126.0(2) |
| O2 <sup>#1</sup> –Ce–O4 <sup>#2</sup> | 76.7(1)  | O4 <sup>#2</sup> –Ce–O5 <sup>#3</sup> | 76.9(1)  | O7–Ce–O8                              | 53.7(2)  |
| O2 <sup>#1</sup> –Ce–O5 <sup>#3</sup> | 153.2(1) | O4 <sup>#2</sup> –Ce–O6 <sup>#2</sup> | 60.9(1)  | O7–Ce–O9                              | 80.4(2)  |
| O2 <sup>#1</sup> –Ce–O6 <sup>#2</sup> | 77.9(2)  | O4 <sup>#2</sup> –Ce–O7               | 136.3(2) | O8–Ce–O9                              | 74.5(2)  |

Hydrogen bonding contacts

| D–H···A                       | d(D–H) | d(H···A) | d(D···A) | ∠(D–H···A) |
|-------------------------------|--------|----------|----------|------------|
| O3–H3A···O12A                 | 0.86   | 1.83     | 2.579    | 144        |
| O3–H3A···O12B                 | 0.86   | 1.84     | 2.695    | 170        |
| O4–H4A···O6 <sup>#2</sup>     | 0.85   | 1.77     | 2.618    | 173        |
| O9–H91···O11                  | 0.82   | 2.14     | 2.795    | 137        |
| O9–H92···O1 <sup>#1</sup>     | 0.82   | 2.00     | 2.818    | 173        |
| O10–H10···O8                  | 0.83   | 1.99     | 2.809    | 170        |
| O11–H11···O7 <sup>#4</sup>    | 0.82   | 2.26     | 3.031    | 158        |
| O12A–H121···O9 <sup>#5</sup>  | 0.83   | 2.13     | 2.756    | 132        |
| O12A–H122···O10               | 0.82   | 2.30     | 2.996    | 143        |
| O12A–H122···O11 <sup>#5</sup> | 0.82   | 2.37     | 3.014    | 137        |
| O12B–H123···O7 <sup>#5</sup>  | 0.79   | 2.11     | 2.874    | 161        |
| O12B–H124···O9 <sup>#5</sup>  | 0.76   | 2.56     | 3.320    | 175        |

<sup>a</sup> Symmetry transformations used to generate equivalent atoms: #1 = *x*, *y*, *z*–1; #2 = –*x*+1/2, *y*–1/2, –*z*+2; #3 = *x*, *y*–1, *z*; #4 = –*x*+1, *y*, –*z*+2; #5 = *x*, *y*+1, *z*.

**Table S3.** Selected Interatomic Distances (Å) and Bond Angles (deg) for **3<sup>a</sup>**

|                                       |          |                                       |          |                                       |          |
|---------------------------------------|----------|---------------------------------------|----------|---------------------------------------|----------|
| Ce–O1                                 | 2.468(4) | Ce–O4 <sup>#2</sup>                   | 2.643(4) | Ce–O7                                 | 2.623(5) |
| Ce–O2 <sup>#1</sup>                   | 2.472(4) | Ce–O5 <sup>#3</sup>                   | 2.525(4) | Ce–O8                                 | 2.569(4) |
| Ce–O3                                 | 2.527(4) | Ce–O6 <sup>#2</sup>                   | 2.479(4) | Ce–O9                                 | 2.567(5) |
| O1–Ce–O2 <sup>#1</sup>                | 129.2(1) | O2 <sup>#1</sup> –Ce–O7               | 124.7(1) | O4 <sup>#2</sup> –Ce–O8               | 130.7(1) |
| O1–Ce–O3                              | 61.0(1)  | O2 <sup>#1</sup> –Ce–O8               | 71.1(1)  | O4 <sup>#2</sup> –Ce–O9               | 65.3(1)  |
| O1–Ce–O4 <sup>#2</sup>                | 120.7(1) | O2 <sup>#1</sup> –Ce–O9               | 83.7(1)  | O5 <sup>#3</sup> –Ce–O6 <sup>#2</sup> | 92.9(1)  |
| O1–Ce–O5 <sup>#3</sup>                | 69.7(1)  | O3–Ce–O4 <sup>#2</sup>                | 127.4(1) | O5 <sup>#3</sup> –Ce–O7               | 75.5(1)  |
| O1–Ce–O6 <sup>#2</sup>                | 73.4(1)  | O3–Ce–O5 <sup>#3</sup>                | 130.7(2) | O5 <sup>#3</sup> –Ce–O8               | 127.0(1) |
| O1–Ce–O7                              | 77.4(2)  | O3–Ce–O6 <sup>#2</sup>                | 72.7(1)  | O5 <sup>#3</sup> –Ce–O9               | 81.5(2)  |
| O1–Ce–O8                              | 108.5(2) | O3–Ce–O7                              | 94.3(2)  | O6 <sup>#2</sup> –Ce–O7               | 150.7(1) |
| O1–Ce–O9                              | 146.9(1) | O3–Ce–O8                              | 73.2(1)  | O6 <sup>#2</sup> –Ce–O8               | 138.9(2) |
| O2 <sup>#1</sup> –Ce–O3               | 71.4(1)  | O3–Ce–O9                              | 145.1(1) | O6 <sup>#2</sup> –Ce–O9               | 125.6(1) |
| O2 <sup>#1</sup> –Ce–O4 <sup>#2</sup> | 75.3(1)  | O4 <sup>#2</sup> –Ce–O5 <sup>#3</sup> | 77.0(1)  | O7–Ce–O8                              | 53.8(1)  |
| O2 <sup>#1</sup> –Ce–O5 <sup>#3</sup> | 152.1(1) | O4 <sup>#2</sup> –Ce–O6 <sup>#2</sup> | 60.7(1)  | O7–Ce–O9                              | 79.9(2)  |
| O2 <sup>#1</sup> –Ce–O6 <sup>#2</sup> | 76.8(1)  | O4 <sup>#2</sup> –Ce–O7               | 138.3(2) | O8–Ce–O9                              | 75.9(2)  |

Hydrogen bonding contacts

| D–H···A                        | d(D–H) | d(H···A) | d(D···A) | ∠(D–H···A) |
|--------------------------------|--------|----------|----------|------------|
| O3–H3A···O11A                  | 0.82   | 1.94     | 2.612    | 139        |
| O3–H3A···O11B                  | 0.82   | 1.87     | 2.615    | 151        |
| O4–H4A···O6 <sup>#2</sup>      | 0.82   | 1.80     | 2.615    | 173        |
| O9–H91···O10A                  | 0.82   | 2.15     | 2.745    | 130        |
| O9–H92···O1 <sup>#1</sup>      | 0.78   | 2.16     | 2.840    | 146        |
| O10A–H101···O7 <sup>#1</sup>   | 0.86   | 1.91     | 2.714    | 157        |
| O10A–H102···O8 <sup>#4</sup>   | 0.82   | 1.90     | 2.713    | 176        |
| O10B–H103···O7 <sup>#1</sup>   | 0.85   | 2.16     | 3.013    | 179        |
| O10B–H104···O8 <sup>#4</sup>   | 0.85   | 2.29     | 3.142    | 179        |
| O11A–H111···O7 <sup>#5</sup>   | 0.83   | 2.16     | 2.989    | 179        |
| O11A–H112···O10A <sup>#6</sup> | 0.84   | 2.64     | 3.452    | 164        |
| O11A–H113···O9 <sup>#5</sup>   | 0.80   | 2.05     | 2.817    | 160        |
| O11A–H114···O10B <sup>#4</sup> | 0.81   | 2.15     | 2.944    | 165        |

<sup>a</sup> Symmetry transformations used to generate equivalent atoms: #1 =  $x, y, z-1$ ; #2 =  $x-1/2, -y+1/2, -z+1$ ; #3 =  $x-1, y, z$ ; #4 =  $-x+1, -y+1, z$ ; #5 =  $x+1, y, z$ ; #6 =  $-x+1, -y+1, z+1$ .

**Table S4.** Selected Interatomic Distances (Å) and Bond Angles (deg) for **4<sup>a</sup>**

|                                       |          |                                       |          |                                       |          |
|---------------------------------------|----------|---------------------------------------|----------|---------------------------------------|----------|
| Ce–O1                                 | 2.472(3) | Ce–O4 <sup>#2</sup>                   | 2.643(3) | Ce–O7                                 | 2.627(3) |
| Ce–O2 <sup>#1</sup>                   | 2.472(3) | Ce–O5 <sup>#3</sup>                   | 2.527(3) | Ce–O8                                 | 2.572(3) |
| Ce–O3                                 | 2.527(3) | Ce–O6 <sup>#2</sup>                   | 2.478(3) | Ce–O9                                 | 2.567(3) |
| O1–Ce–O2 <sup>#1</sup>                | 129.4(1) | O2 <sup>#1</sup> –Ce–O7               | 124.5(1) | O4 <sup>#2</sup> –Ce–O8               | 131.0(1) |
| O1–Ce–O3                              | 61.2(1)  | O2 <sup>#1</sup> –Ce–O8               | 71.2(1)  | O4 <sup>#2</sup> –Ce–O9               | 65.4(1)  |
| O1–Ce–O4 <sup>#2</sup>                | 120.8(1) | O2 <sup>#1</sup> –Ce–O9               | 83.6(1)  | O5 <sup>#3</sup> –Ce–O6 <sup>#2</sup> | 93.2(1)  |
| O1–Ce–O5 <sup>#3</sup>                | 69.8(1)  | O3–Ce–O4 <sup>#2</sup>                | 127.3(1) | O5 <sup>#3</sup> –Ce–O7               | 75.6(1)  |
| O1–Ce–O6 <sup>#2</sup>                | 73.6(1)  | O3–Ce–O5 <sup>#3</sup>                | 131.0(1) | O5 <sup>#3</sup> –Ce–O8               | 126.9(1) |
| O1–Ce–O7                              | 77.4(1)  | O3–Ce–O6 <sup>#2</sup>                | 72.5(1)  | O5 <sup>#3</sup> –Ce–O9               | 81.4(1)  |
| O1–Ce–O8                              | 108.1(1) | O3–Ce–O7                              | 94.5(1)  | O6 <sup>#2</sup> –Ce–O7               | 150.9(1) |
| O1–Ce–O9                              | 146.7(1) | O3–Ce–O8                              | 73.0(1)  | O6 <sup>#2</sup> –Ce–O8               | 138.6(1) |
| O2 <sup>#1</sup> –Ce–O3               | 71.3(1)  | O3–Ce–O9                              | 144.9(1) | O6 <sup>#2</sup> –Ce–O9               | 125.8(1) |
| O2 <sup>#1</sup> –Ce–O4 <sup>#2</sup> | 75.4(1)  | O4 <sup>#2</sup> –Ce–O5 <sup>#3</sup> | 76.9(1)  | O7–Ce–O8                              | 53.6(1)  |
| O2 <sup>#1</sup> –Ce–O5 <sup>#3</sup> | 152.0(1) | O4 <sup>#2</sup> –Ce–O6 <sup>#2</sup> | 60.8(1)  | O7–Ce–O9                              | 79.7(1)  |
| O2 <sup>#1</sup> –Ce–O6 <sup>#2</sup> | 76.7(1)  | O4 <sup>#2</sup> –Ce–O7               | 138.1(1) | O8–Ce–O9                              | 76.0(1)  |

Hydrogen bonding contacts

| D–H···A                        | d(D–H) | d(H···A) | d(D···A) | ∠(D–H···A) |
|--------------------------------|--------|----------|----------|------------|
| O3–H3A···O11A                  | 0.82   | 1.96     | 2.630    | 139        |
| O3–H3A···O11B                  | 0.82   | 1.86     | 2.608    | 151        |
| O4–H4A···O6 <sup>#2</sup>      | 0.82   | 1.79     | 2.607    | 174        |
| O9–H91···O10A                  | 0.82   | 2.17     | 2.770    | 130        |
| O9–H92···O1 <sup>#1</sup>      | 0.81   | 2.14     | 2.835    | 145        |
| O10A–H101···O7 <sup>#1</sup>   | 0.82   | 1.93     | 2.711    | 159        |
| O10A–H102···O8 <sup>#4</sup>   | 0.82   | 1.90     | 2.721    | 174        |
| O10B–H103···O7 <sup>#1</sup>   | 0.85   | 2.18     | 3.029    | 175        |
| O10B–H104···O8 <sup>#4</sup>   | 0.83   | 2.30     | 3.128    | 179        |
| O11A–H111···O7 <sup>#5</sup>   | 0.81   | 2.15     | 2.961    | 176        |
| O11A–H112···O10A <sup>#6</sup> | 0.82   | 2.61     | 3.416    | 165        |
| O11A–H113···O9 <sup>#5</sup>   | 0.79   | 2.07     | 2.827    | 160        |
| O11A–H114···O10B <sup>#4</sup> | 0.83   | 2.13     | 2.939    | 164        |

<sup>a</sup> Symmetry transformations used to generate equivalent atoms: #1 =  $x, y, z+1$ ; #2 =  $x+1/2, -y+3/2, -z+1$ ; #3 =  $x+1, y, z$ ; #4 =  $-x+1, -y+1, z$ ; #5 =  $x-1, y, z$ ; #6 =  $-x+1, -y+1, z-1$ .

**Table S5.** Selected Interatomic Distances (Å) and Bond Angles (deg) for **5**<sup>a</sup>

|                          |          |                                          |          |                           |          |
|--------------------------|----------|------------------------------------------|----------|---------------------------|----------|
| Ce1–O1                   | 2.459(4) | Ce1–O13 <sup>#3</sup>                    | 2.488(4) | Ce2–O6                    | 2.416(5) |
| Ce1–O3                   | 2.611(4) | Ce1–O14 <sup>#4</sup>                    | 2.455(5) | Ce2–O9                    | 2.496(4) |
| Ce1–O7                   | 2.570(4) | Ce1–O15                                  | 2.526(5) | Ce2–O11                   | 2.604(5) |
| Ce1–O8                   | 2.595(4) | Ce2–O2 <sup>#5</sup>                     | 2.391(4) | Ce2–O12                   | 2.572(4) |
| Ce1–O8 <sup>#1</sup>     | 2.561(4) | Ce2–O4                                   | 2.645(4) | Ce2–O16                   | 2.688(5) |
| Ce1–O10 <sup>#2</sup>    | 2.509(4) | Ce2–O5 <sup>#6</sup>                     | 2.417(4) | Ce2–O17                   | 2.596(5) |
| O1–Ce1–O3                | 62.8(1)  | O8–Ce1–O14 <sup>#4</sup>                 | 127.2(1) | O4–Ce2–O12                | 132.0(1) |
| O1–Ce1–O7                | 79.4(2)  | O8–Ce1–O15                               | 117.1(2) | O4–Ce2–O16                | 132.8(1) |
| O1–Ce1–O8                | 121.0(1) | O8 <sup>#1</sup> –Ce1–O10 <sup>#2</sup>  | 96.0(1)  | O4–Ce2–O17                | 129.5(1) |
| O1–Ce1–O8 <sup>#1</sup>  | 130.5(1) | O8 <sup>#1</sup> –Ce1–O13 <sup>#3</sup>  | 148.4(2) | O5 <sup>#6</sup> –Ce2–O6  | 126.4(2) |
| O1–Ce1–O10 <sup>#2</sup> | 133.3(2) | O8 <sup>#1</sup> –Ce1–O14 <sup>#4</sup>  | 71.0(2)  | O5 <sup>#6</sup> –Ce2–O9  | 82.3(2)  |
| O1–Ce1–O13 <sup>#3</sup> | 68.9(2)  | O8 <sup>#1</sup> –Ce1–O15                | 75.8(1)  | O5 <sup>#6</sup> –Ce2–O11 | 144.6(2) |
| O1–Ce1–O14 <sup>#4</sup> | 72.7(2)  | O10 <sup>#2</sup> –Ce1–O13 <sup>#3</sup> | 72.9(2)  | O5 <sup>#6</sup> –Ce2–O12 | 149.9(2) |
| O1–Ce1–O15               | 121.9(2) | O10 <sup>#2</sup> –Ce1–O14 <sup>#4</sup> | 139.5(2) | O5 <sup>#6</sup> –Ce2–O16 | 82.5(2)  |
| O3–Ce1–O7                | 77.3(1)  | O10 <sup>#2</sup> –Ce1–O15               | 68.1(2)  | O5 <sup>#6</sup> –Ce2–O17 | 81.7(2)  |
| O3–Ce1–O8                | 72.1(1)  | O13 <sup>#3</sup> –Ce1–O14 <sup>#4</sup> | 97.9(2)  | O6–Ce2–O9                 | 81.9(2)  |
| O3–Ce1–O8 <sup>#1</sup>  | 74.9(1)  | O13 <sup>#3</sup> –Ce1–O15               | 72.5(2)  | O6–Ce2–O11                | 74.2(2)  |
| O3–Ce1–O10 <sup>#2</sup> | 142.6(1) | O14 <sup>#4</sup> –Ce1–O15               | 71.5(2)  | O6–Ce2–O12                | 74.9(2)  |
| O3–Ce1–O13 <sup>#3</sup> | 131.4(1) | O2 <sup>#5</sup> –Ce2–O4                 | 70.6(2)  | O6–Ce2–O16                | 136.4(2) |
| O3–Ce1–O14 <sup>#4</sup> | 72.6(2)  | O2 <sup>#5</sup> –Ce2–O5 <sup>#6</sup>   | 83.1(2)  | O6–Ce2–O17                | 136.3(2) |
| O3–Ce1–O15               | 139.2(2) | O2 <sup>#5</sup> –Ce2–O6                 | 78.5(2)  | O9–Ce2–O11                | 72.0(1)  |
| O7–Ce1–O8                | 54.3(1)  | O2 <sup>#5</sup> –Ce2–O9                 | 141.3(2) | O9–Ce2–O12                | 125.1(1) |
| O7–Ce1–O8 <sup>#1</sup>  | 116.1(1) | O2 <sup>#5</sup> –Ce2–O11                | 131.9(2) | O9–Ce2–O16                | 139.2(2) |
| O7–Ce1–O10 <sup>#2</sup> | 74.7(1)  | O2 <sup>#5</sup> –Ce2–O12                | 81.1(2)  | O9–Ce2–O17                | 68.5(2)  |
| O7–Ce1–O13 <sup>#3</sup> | 90.0(2)  | O2 <sup>#5</sup> –Ce2–O16                | 73.2(2)  | O11–Ce2–O12               | 54.1(1)  |
| O7–Ce1–O14 <sup>#4</sup> | 145.8(2) | O2 <sup>#5</sup> –Ce2–O17                | 143.5(2) | O11–Ce2–O16               | 101.3(2) |
| O7–Ce1–O15               | 142.0(2) | O4–Ce2–O5 <sup>#6</sup>                  | 64.2(2)  | O11–Ce2–O17               | 66.6(2)  |
| O8–Ce1–O8 <sup>#1</sup>  | 62.7(2)  | O4–Ce2–O6                                | 62.2(1)  | O12–Ce2–O16               | 68.5(2)  |
| O8–Ce1–O10 <sup>#2</sup> | 71.6(1)  | O4–Ce2–O9                                | 70.8(1)  | O12–Ce2–O17               | 96.2(2)  |
| O8–Ce1–O13 <sup>#3</sup> | 134.9(1) | O4–Ce2–O11                               | 125.4(1) | O16–Ce2–O17               | 72.0(2)  |

Hydrogen bonding contacts

| D–H···A                      | d(D–H) | d(H···A) | d(D···A) | ∠(D–H···A) |
|------------------------------|--------|----------|----------|------------|
| O3–H3A···O7 <sup>#8</sup>    | 0.83   | 2.05     | 2.869    | 173        |
| O4–H4A···O16 <sup>#7</sup>   | 0.83   | 2.32     | 3.133    | 171        |
| O15–H15A···O17 <sup>#4</sup> | 0.84   | 2.06     | 2.886    | 166        |
| O15–H15B···O9 <sup>#1</sup>  | 0.84   | 2.07     | 2.877    | 161        |
| O16–H16A···O1 <sup>#10</sup> | 0.84   | 2.16     | 2.954    | 158        |
| O16–H16B···O6 <sup>#6</sup>  | 0.84   | 2.49     | 3.041    | 124        |
| O17–H17A···O13 <sup>#6</sup> | 0.84   | 2.09     | 2.923    | 169        |
| O17–H17B···O15 <sup>#2</sup> | 0.85   | 2.01     | 2.854    | 171        |

<sup>a</sup> Symmetry transformations used to generate equivalent atoms: #1 =  $-x, -y+1, -z$ ; #2 =  $-x+1, -y+1, -z$ ; #3 =  $x+1, y, z+1$ ; #4 =  $x, y, z+1$ ; #5 =  $x, -y+1/2, z-1/2$ ; #6 =  $x+1, y, z$ ; #7 =  $x-1, y, z$ ; #8 =  $x, -y+1/2, z+1/2$ ; #9 =  $x, y, z+1$ ; #10 =  $x, y, z-1$

## Figure captions

**Figure S1.** PXRD patterns measured, simulated along with the i.r. spectrum for **1**.

**Figure S2.** PXRD patterns measured, simulated along with the i.r. spectrum for **2**.

**Figure S3.** PXRD patterns measured, simulated along with the i.r. spectrum for **3**.

**Figure S4.** PXRD patterns measured, simulated along with the i.r. spectrum for **4**.

**Figure S5.** PXRD patterns measured, simulated along with the i.r. spectrum for **5**.

**Figure S6.** 2D  $\frac{2}{\infty}$  [Ce<sub>2</sub>(H<sub>2</sub>O)<sub>2</sub>(L-tar)<sub>2</sub>] network, 3D  $\frac{3}{\infty}$  {  $\frac{2}{\infty}$  [M<sub>2</sub>(H<sub>2</sub>O)<sub>2</sub>(L-tar)<sub>2</sub>](SO<sub>4</sub>) }  
framework along with the corresponding topological nets in **2**.

**Figure S7.** 2D  $\frac{2}{\infty}$  [Ce<sub>2</sub>(H<sub>2</sub>O)<sub>2</sub>(L-tar)<sub>2</sub>] network, 3D  $\frac{3}{\infty}$  {  $\frac{2}{\infty}$  [M<sub>2</sub>(H<sub>2</sub>O)<sub>2</sub>(L-tar)<sub>2</sub>](SO<sub>4</sub>) }  
framework along with the corresponding topological nets in **3**.

**Figure S8.** 2D  $\frac{2}{\infty}$  [Ce<sub>2</sub>(H<sub>2</sub>O)<sub>2</sub>(L-tar)<sub>2</sub>] network, 3D  $\frac{3}{\infty}$  {  $\frac{2}{\infty}$  [M<sub>2</sub>(H<sub>2</sub>O)<sub>2</sub>(L-tar)<sub>2</sub>](SO<sub>4</sub>) }  
framework along with the corresponding topological nets in **4**.

**Figure S9.** TG curves for **1-5**.

Figure S1.

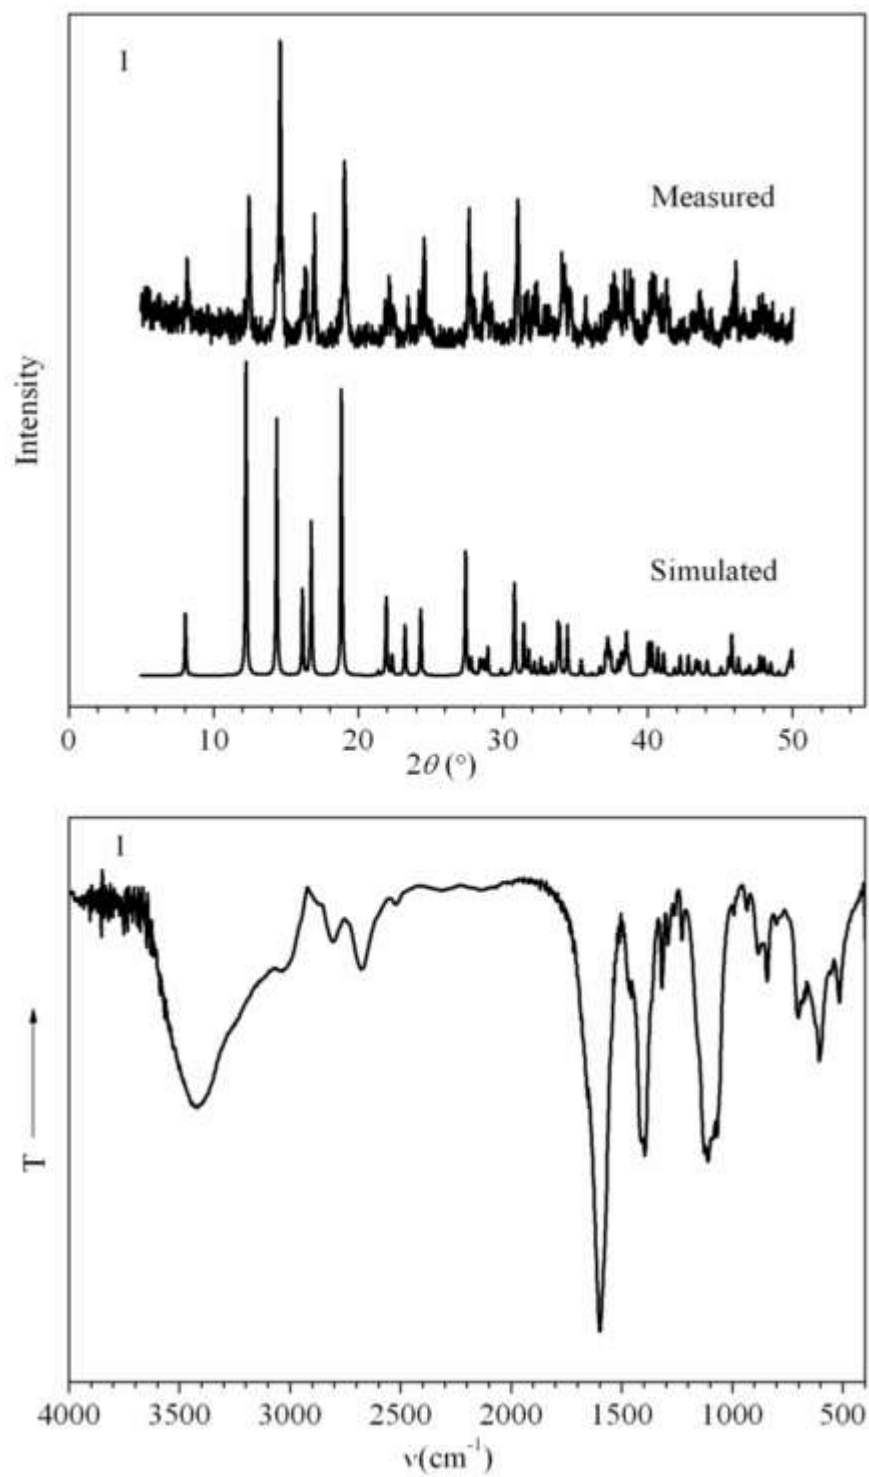



Figure S2.

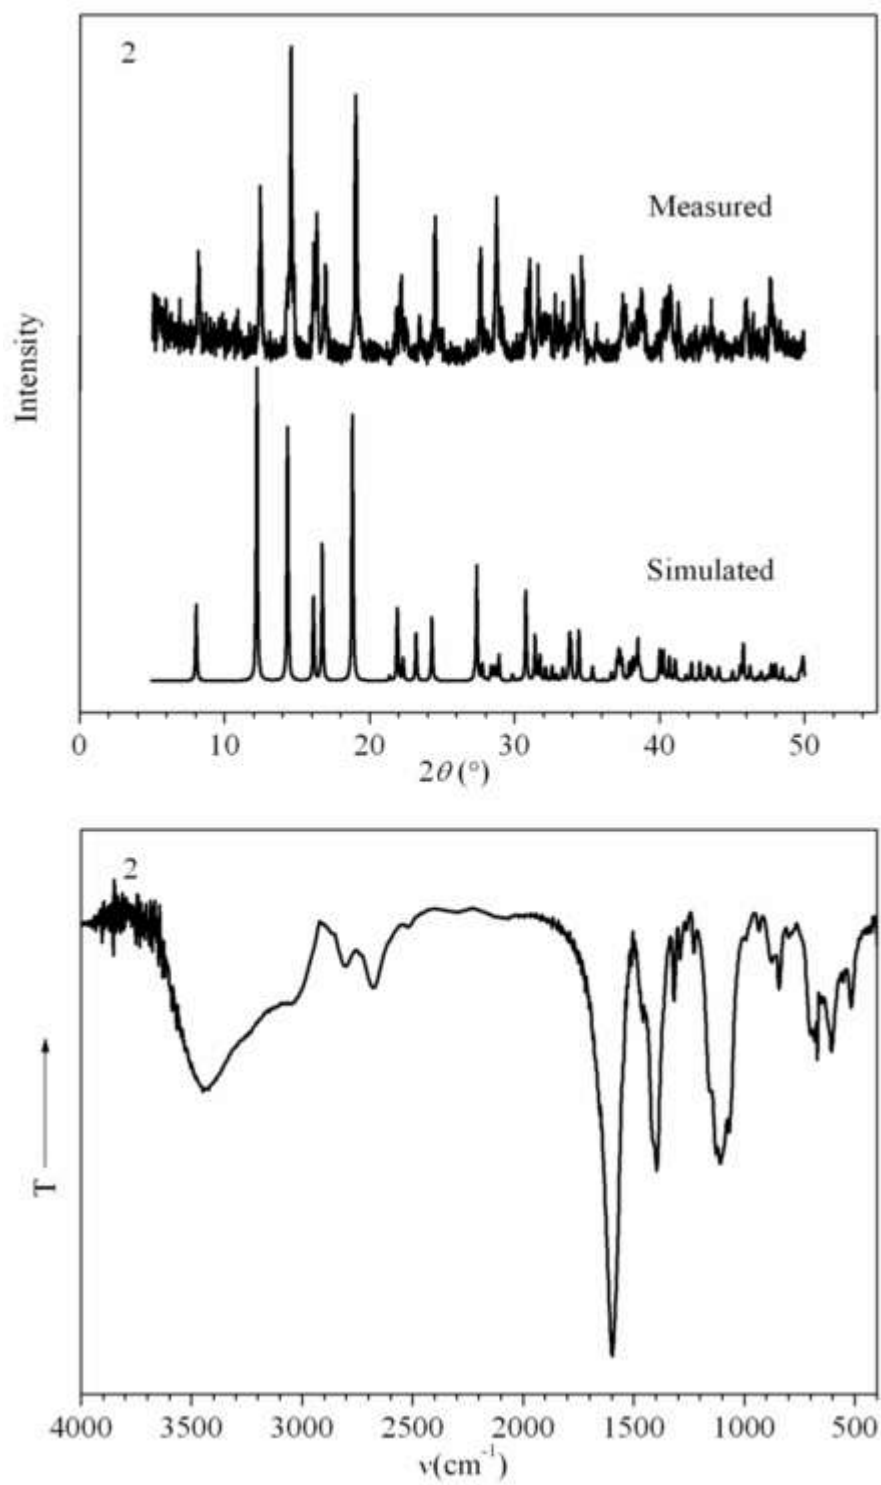

Figure S3.

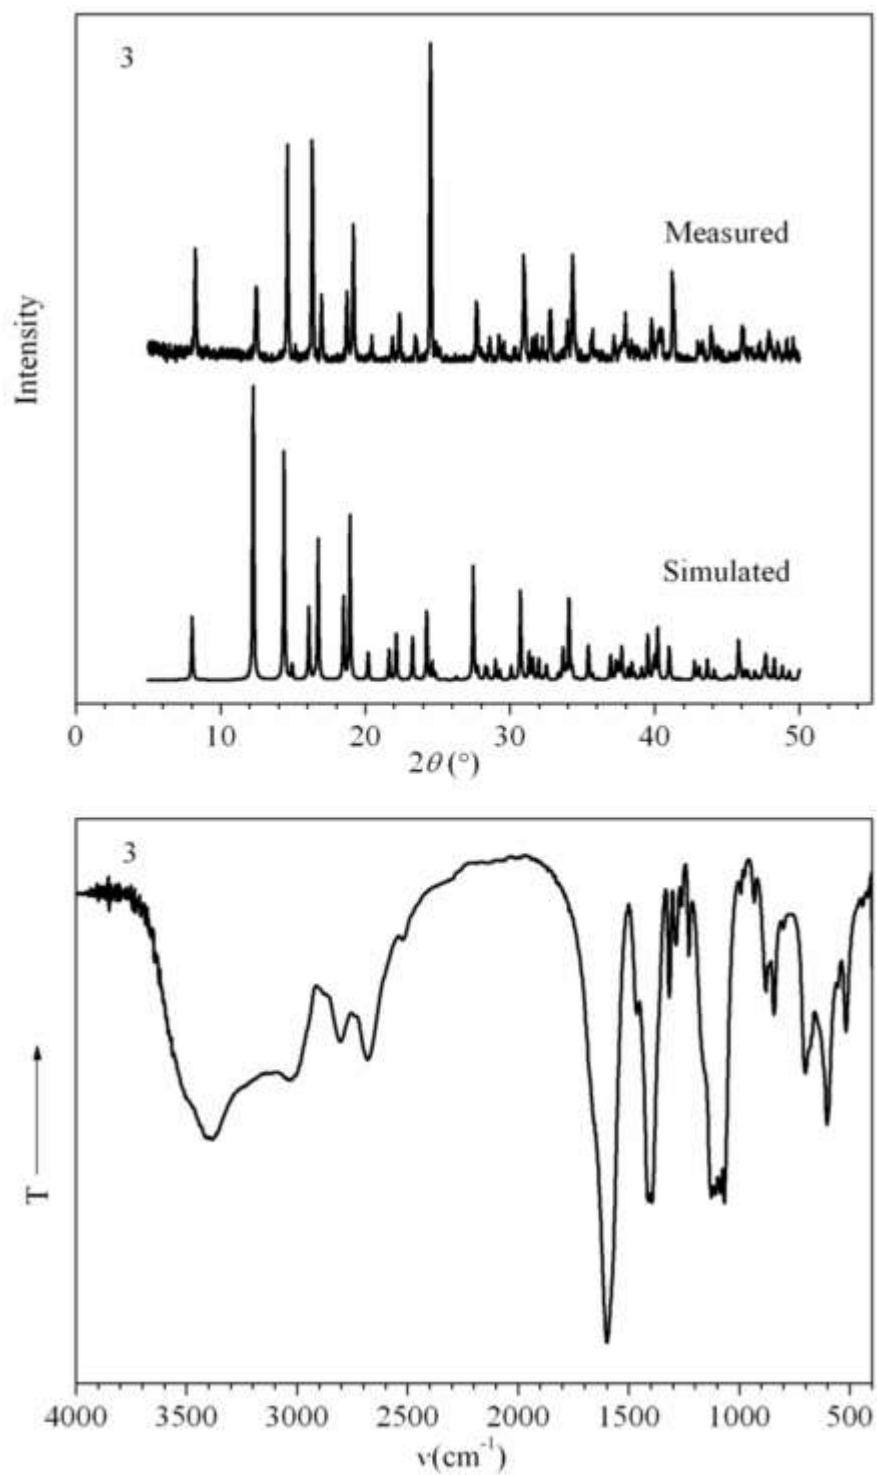

Figure S4.

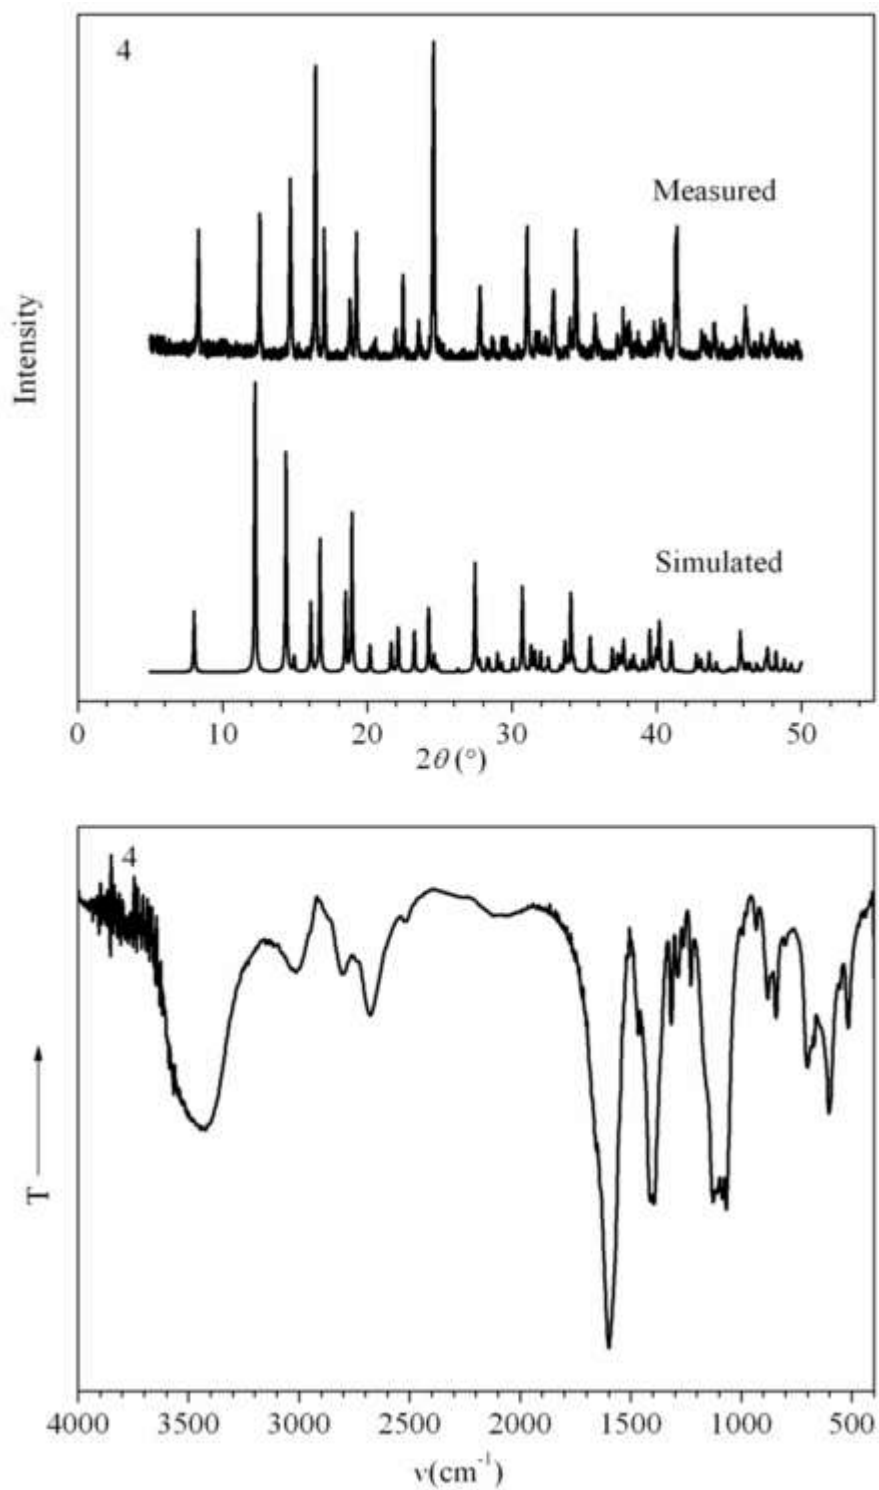

Figure S5.

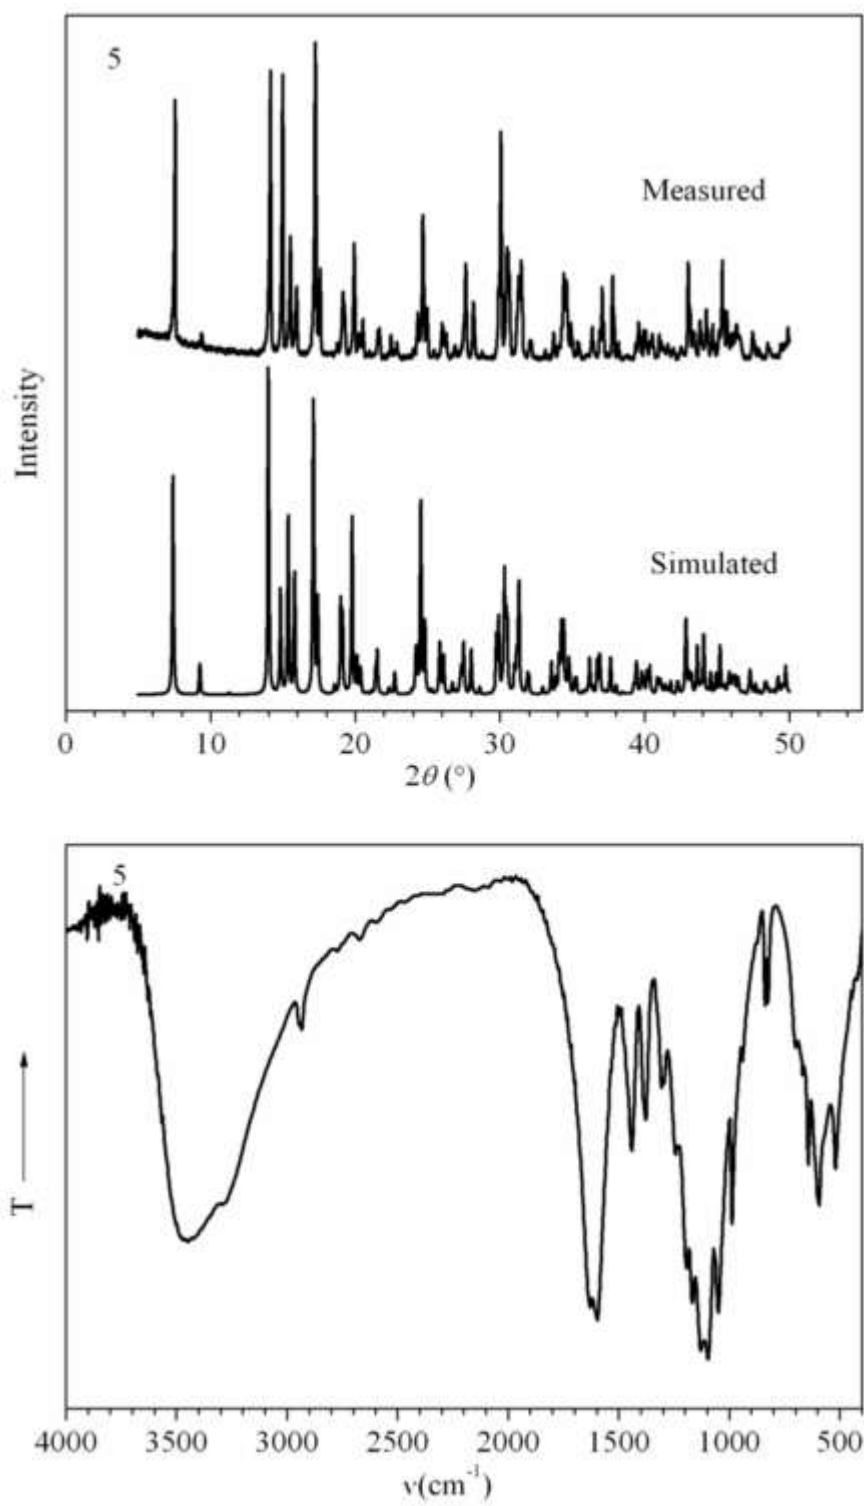

**Figure S6.**

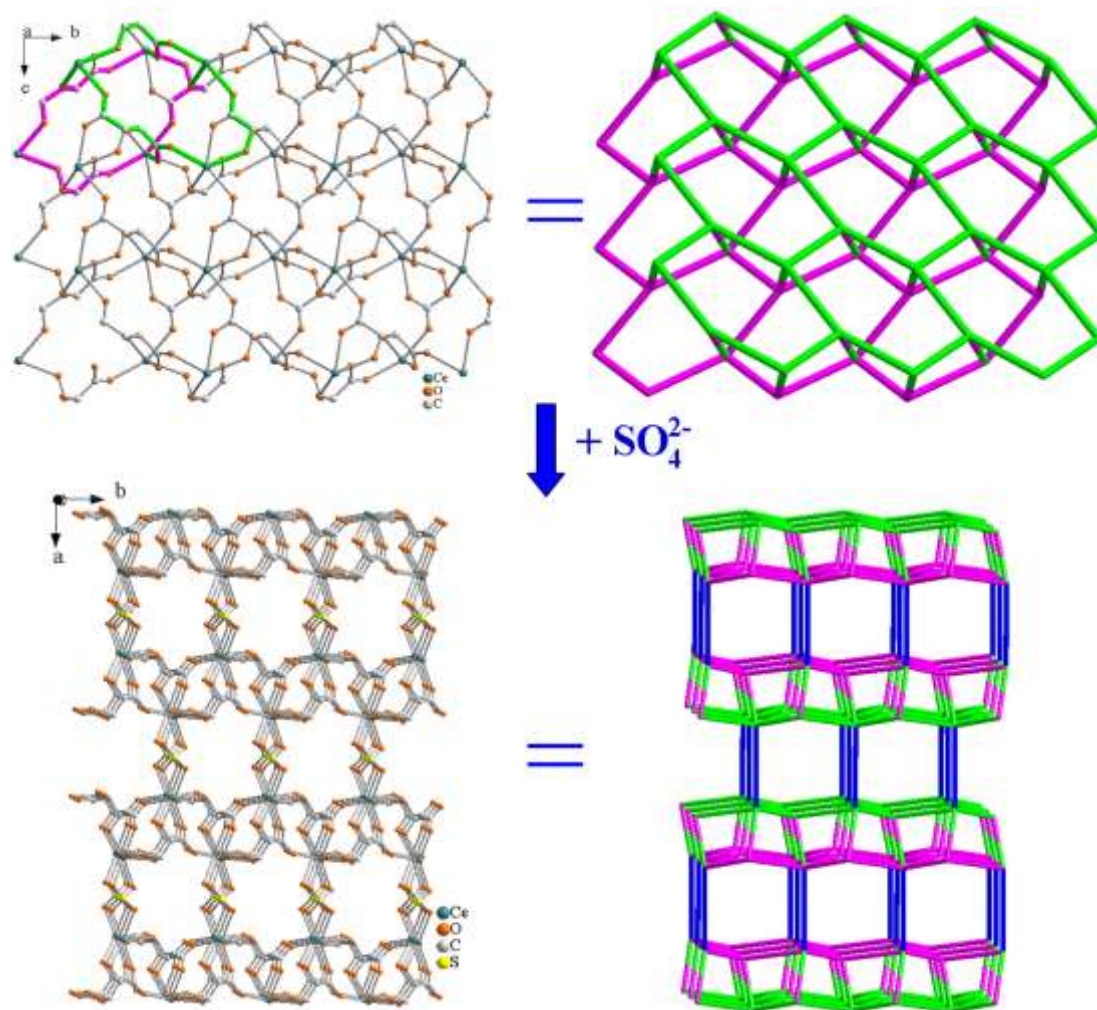

Figure S7.

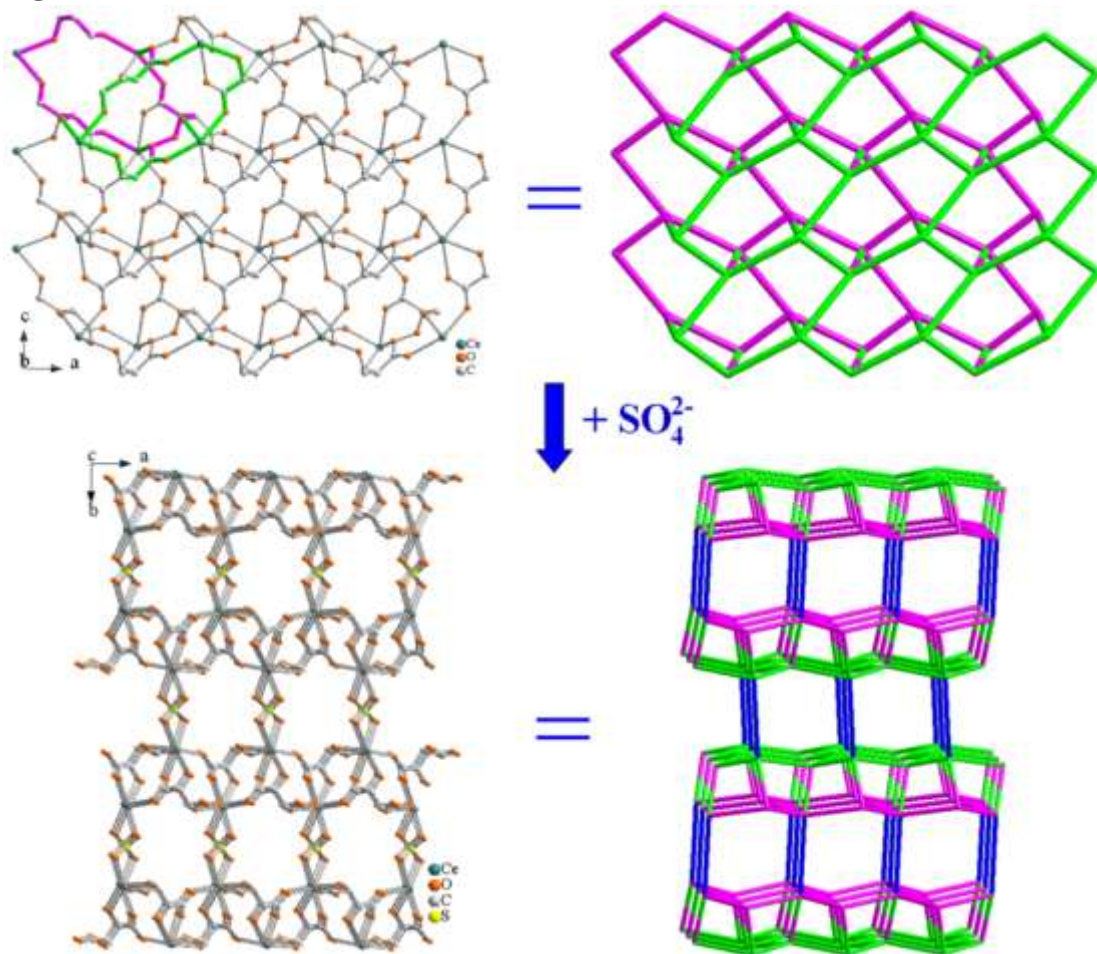

Figure S8.

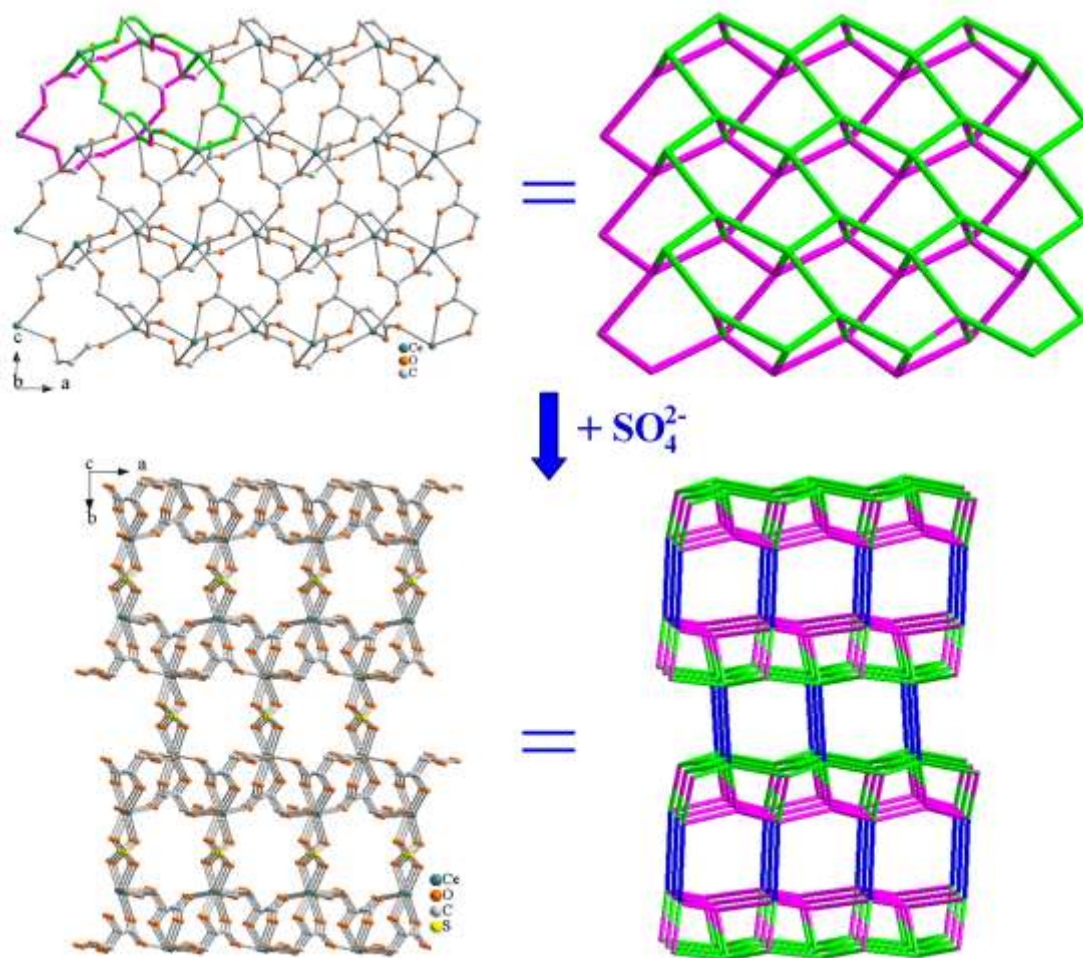

**Figure S9.**

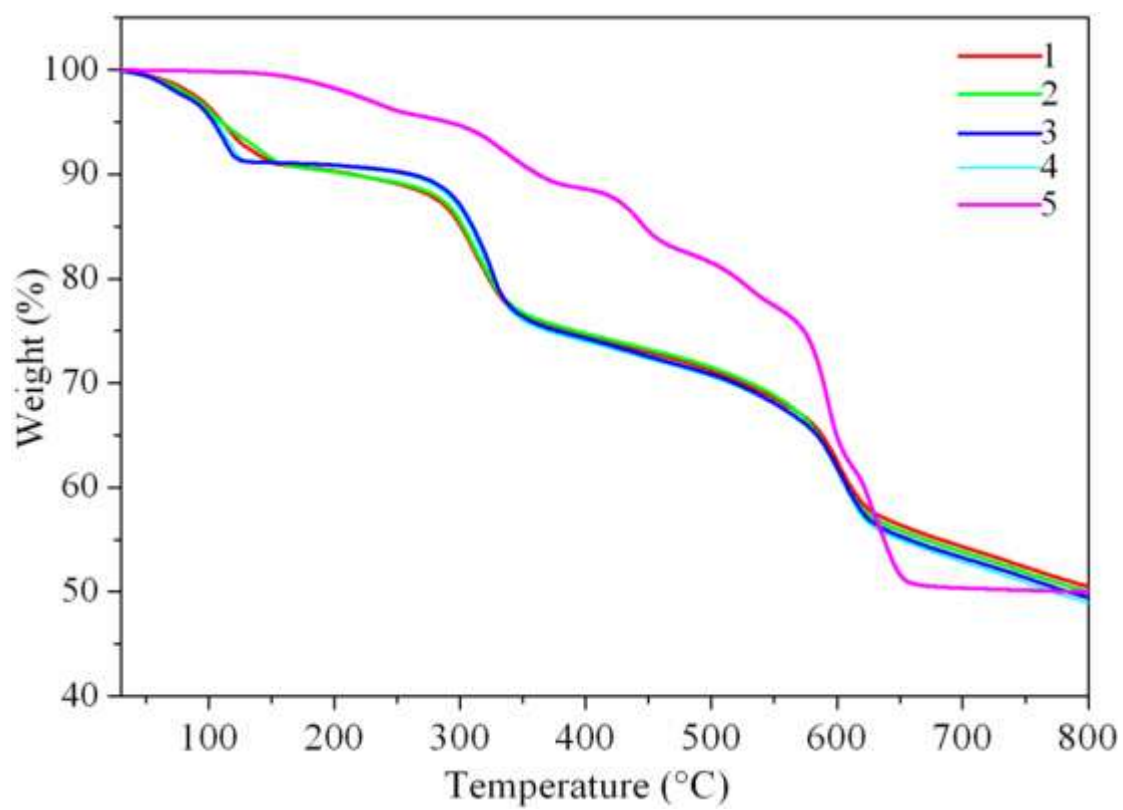

Supplement: c3ce41740a.pdf [file c3ce41740a.pdf]
